# Supplementary material for: Alginate-tungsten trioxide-reduced graphene-based membranes for PEM fuel cells operating above the boiling point of water
Source: Royal Society of Chemistry journal article supplement (doi:10.1039/d5ra05401j), 2025-01-01
Supplement: d5ra05401j1.pdf [file d5ra05401j1.pdf]

## Supplementary Material

Thermogravimetric analysis (TGA) was conducted in an N<sub>2</sub> atmosphere with a heating rate of 10°C/min. The Scanning electron microscopy (SEM) testing was performed via a Tescan VEGA XMU, LaB6 filament, Oxford Instruments X-Max 50 SSD detector.

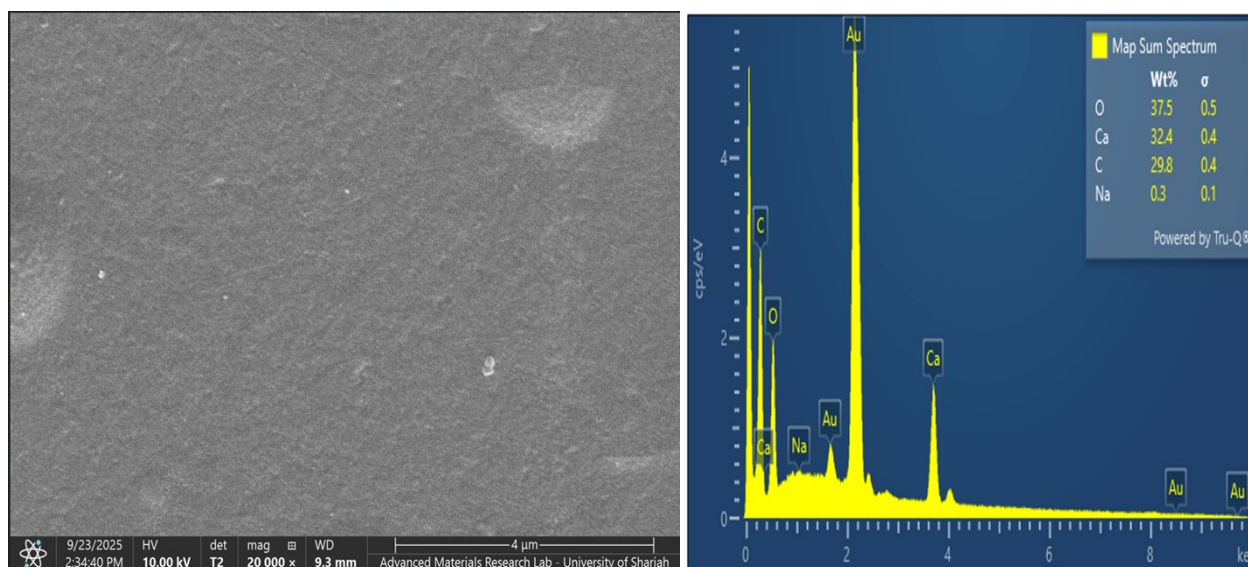

Figure S-1 SEM and EDX for pristine SA membrane.

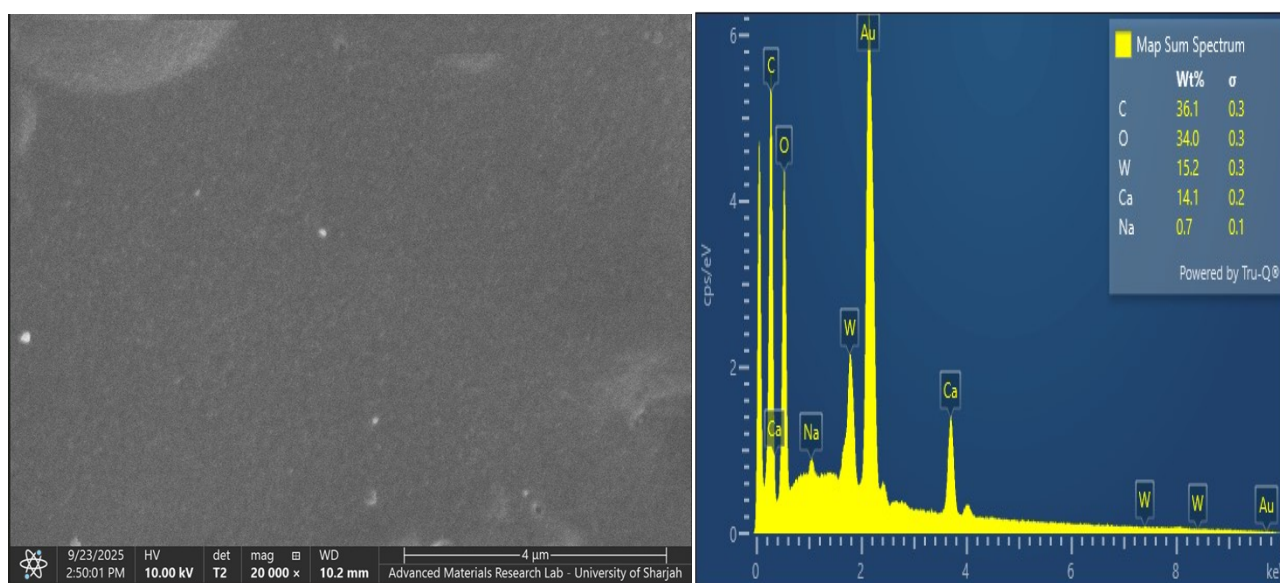

Figure S-2 SEM and EDX for WO<sub>3</sub>-rG/SA membranes.

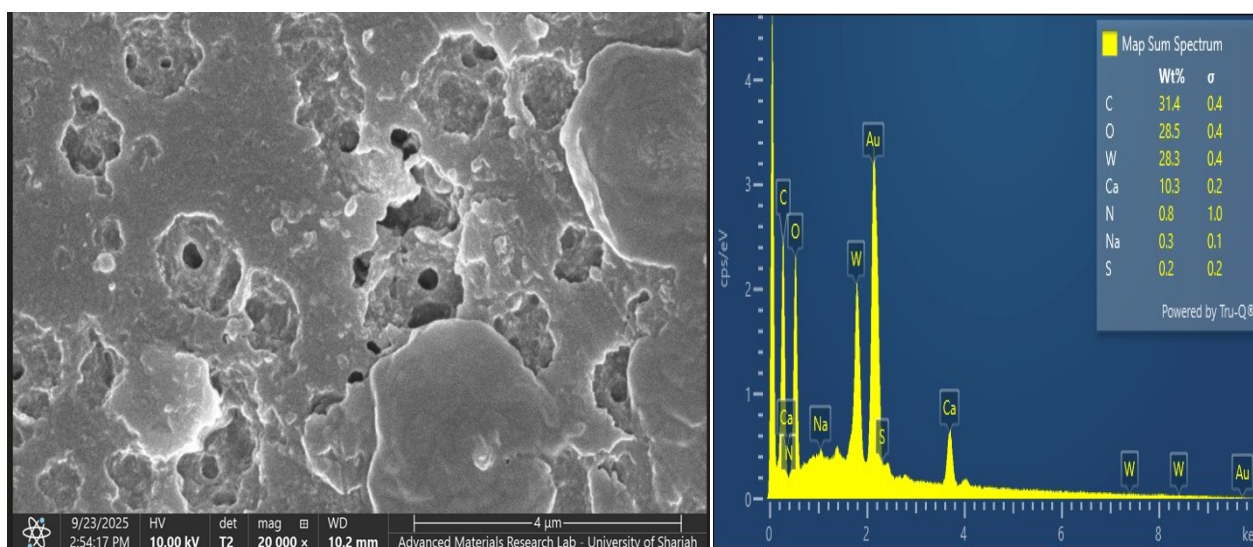

Figure S-3 SEM and EDX for WO<sub>3</sub>-rG/IL/SA membranes.

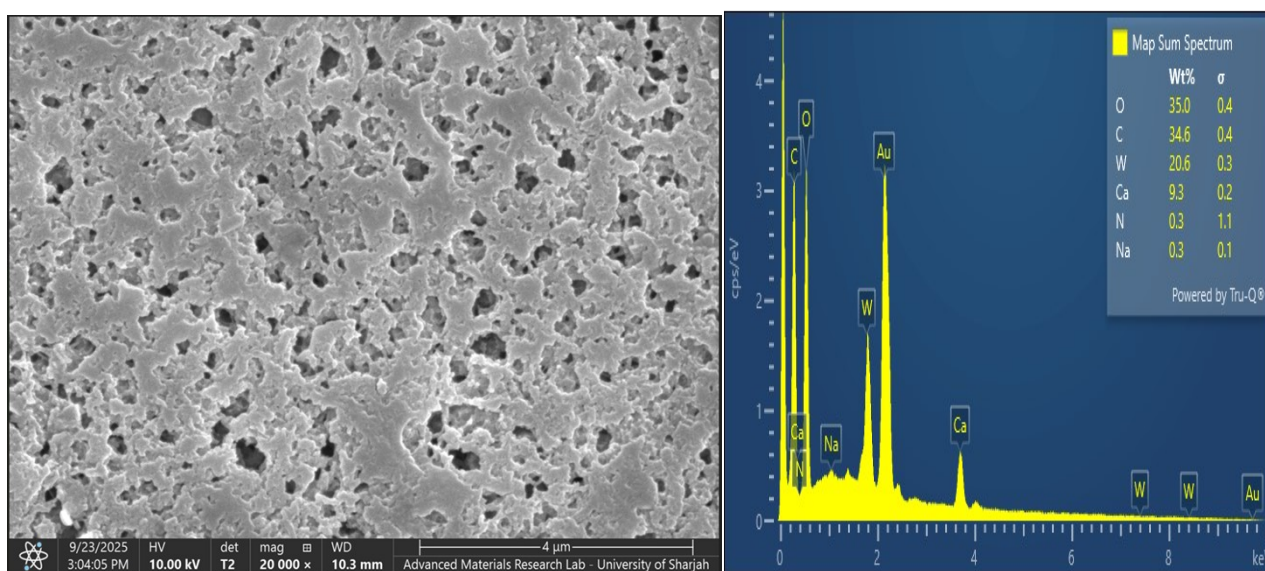

Figure S-4 SEM and EDX for WO<sub>3</sub>-rG/PEG/SA membranes.

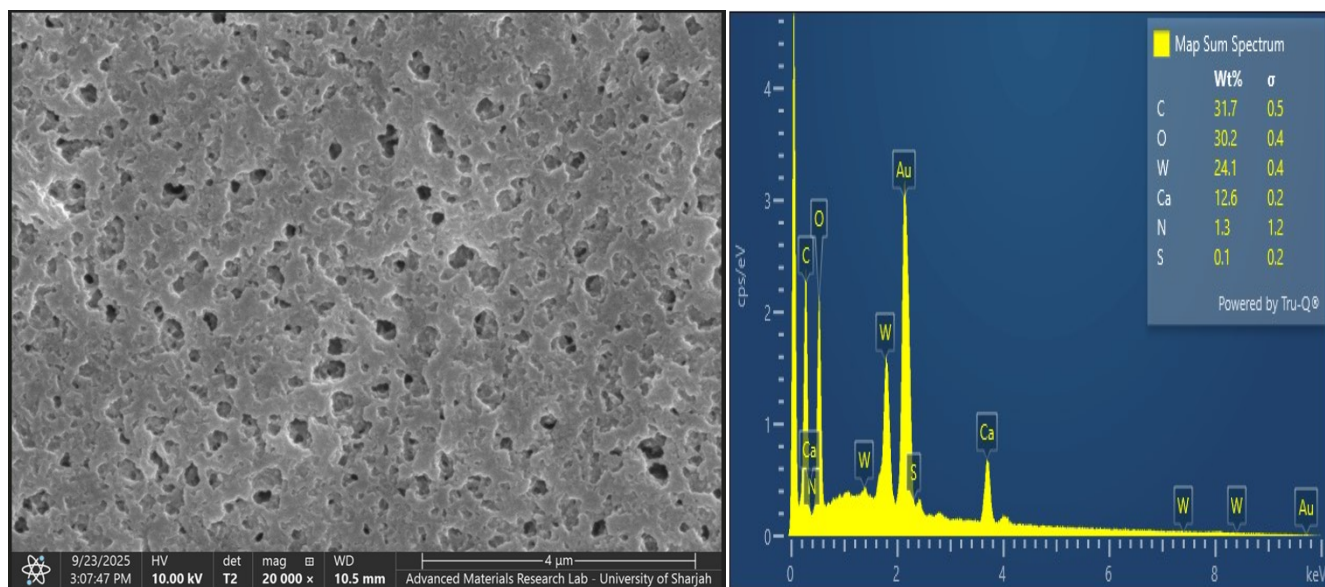

Figure S-5 SEM and EDX for  $\text{WO}_3$ -rG/IL/PEG/SA membranes.

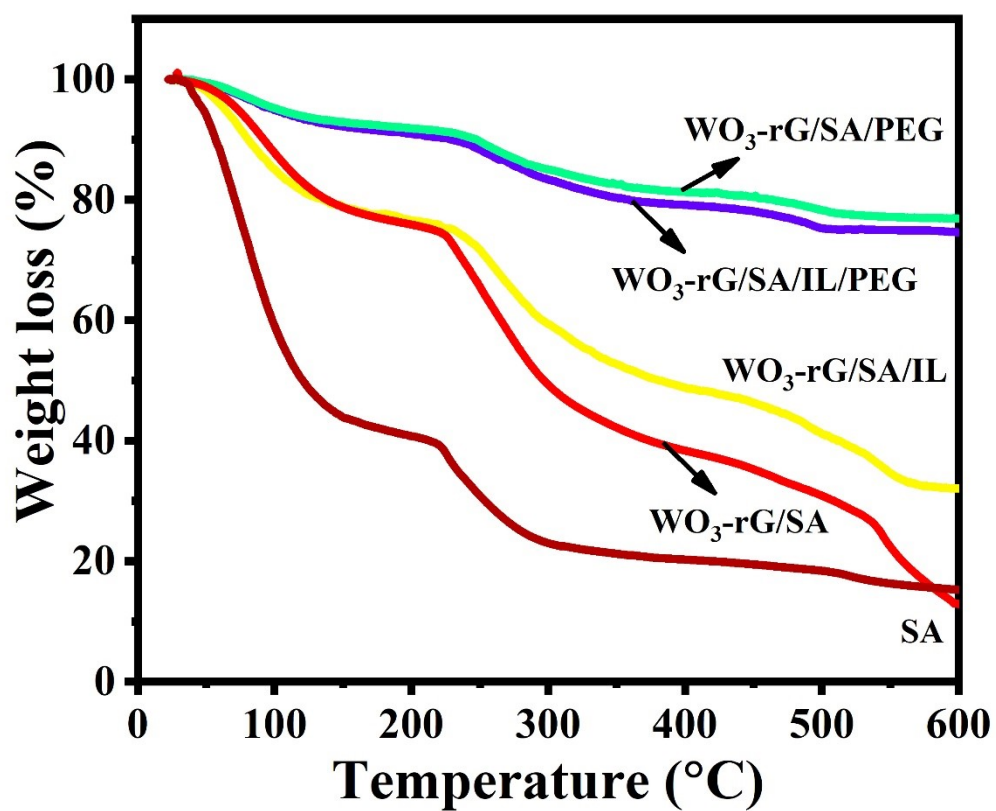

Figure S-6: TGA for the prepared membranes in this work.
